# Supplementary material for: Fabrication and photoluminescence of chemically stable La2O3:Eu3+–La2Sn2O7core–shell-structured nanoparticles
Source: Royal Society of Chemistry journal article supplement (doi:10.1039/b408495k), 2004-01-01
Supplement: b408495k.pdf [file b408495k.pdf]

**Fabrication and photoluminescence of chemically stable  $\text{La}_2\text{O}_3:\text{Eu}^{3+}/\text{La}_2\text{Sn}_2\text{O}_7$   
core-shell-structured nanoparticles**

Eiji Hosono and Shinobu Fujihara \*

*Department of Applied Chemistry, Faculty of Science and Technology, Keio University, 3-14-1*

*Hiyoshi, Kohoku-ku, Yokohama 223-8522, Japan*

*\*E-mail: shinobu@aplc.keio.ac.jp*

**Experimental procedure**

Lanthanum diacetate hydroxide (LDAH) modified with europium and trifluoroacetate ions was precipitated in methanolic solutions of pertinent RE acetates and trifluoroacetic acid at 60°C. A molar ratio of La:Eu was fixed to 10:1. The precipitated LDAH powders were then dried at room temperature and subsequently heated at 600°C for 1 h to be converted into  $\text{LaOF}:\text{Eu}^{3+}$  nanoparticles.

$\text{Na}_2\text{SnO}_3 \cdot 3\text{H}_2\text{O}$  was dissolved in an aqueous NaOH solution (pH = 10.5). The  $\text{LaOF}:\text{Eu}^{3+}$  powders were added to the resultant  $\text{Na}_2\text{SnO}_3$  solution and ultrasonicated for 10 min. The mixture was then heated at 60°C for 1 h under reflux. After cooling to room temperature, the powders were centrifuged, washed with ethanol, and dried. Final heat treatments were performed typically at 1000°C for 1 h in air to obtain the core-shell-structured nanoparticles.

Crystal structure identification was made by X-ray diffraction (XRD) with a Rigaku model RAD-C diffractometer using Cu  $K\alpha$  radiation. Particle morphology was observed by transmission electron microscopy (TEM) with a Philips model TECNAI F20 microscope. Photoluminescence (PL) spectra were measured at room temperature with a Shimadzu model RF-5700PC using a Xe lamp (150 W) as an ultraviolet (UV) light source. Emission scans were performed with a 1.5 nm bandpass emission slit. An optical filter, which eliminated light having wavelengths smaller than 390 nm, was used to remove a second-order peak of the excitation light.

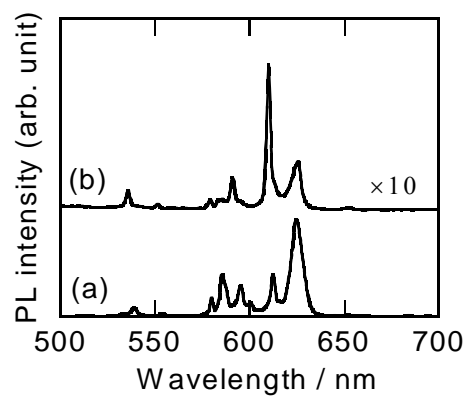

**Fig. S1** PL spectra of (a) the  $\text{La}_2\text{O}_3:\text{Eu}^{3+}/\text{La}_2\text{Sn}_2\text{O}_7$  powder and (b) the non-coated  $\text{La}_2\text{O}_3:\text{Eu}^{3+}$  powder, aged under ambient atmosphere over 5 days. The non-coated powder was actually converted into  $\text{La}(\text{OH})_3$  according to the XRD analysis, and exhibited very weak PL intensities.
